# Supplementary material
Source: PubMed Central journal article supplement (PMC7158584)
Supplement: mmc1.pdf [file mmc1.pdf]

# THE LANCET

## Gastroenterology & Hepatology

### Supplementary appendix

Supplement to: Wu Y, Guo C, Tang L, et al. Prolonged presence of SARS-CoV-2 viral RNA in faecal samples. *Lancet Gastroenterol Hepatol* 2020; published online March 19. [https://doi.org/10.1016/S2468-1253\(20\)30083-2](https://doi.org/10.1016/S2468-1253(20)30083-2).

This translation in Chinese was submitted by the authors and we reproduce it as supplied. It has not been peer reviewed. *The Lancet's* editorial processes have only been applied to the original in English, which should serve as reference for this manuscript.

此简体中文译文由作者提交，我方按照提供的版本刊登。此译文并未经过同行审阅。医学期刊《柳叶刀》的编辑流程仅适用于英文原稿，英文原稿应作为此手稿的参考。



环境中仍可存活数天，提示存在粪-口传播潜在威胁，类似于严重急性呼吸综合征冠状病毒(SARS-CoV-1)和中东呼吸系统综合征冠状病毒(MERS-CoV)。因此，我们强烈建议在患者呼吸道样本病毒核酸阴性后，对粪便样本进行常规实时荧光定量PCR检测。如果患者粪便样本呈阳性，应采取严格隔离措施防止传染。

我们对任何新发传染病的定义随着我们对疾病认知的积累而不断发展和改变。目前确诊疑似SARS-CoV-2感染的方法是连续两次咽拭子核酸检测阳性。我们的数据表明，粪便样本SARS-CoV-2核酸阳性结果通常滞后于呼吸道样本。因此，我们不建议在现有的COVID-19诊断流程中增加粪便样本检测。但是，粪便样本核酸阳性时间决定何时终止隔离措施，以防止病毒从恢复期患者传播至他人，这对于医疗资源调配至关重要。因此我们建议增加患者粪便SARS-CoV-2核酸检测。目前的出院标准为患者相关临床症状消失，痰或呼吸道病毒核酸实时荧光定量PCR检测至少连续两次阴性，且样品采集时间间隔超过24小时。本研究中，我们观察到超过一半的患者，在呼吸道样本病毒核酸转阴后粪便样本核酸阳性平均持续 $11.2 \pm 9.6$ 天，这意味

着该病毒可能在患者的胃肠道中复制繁殖，在呼吸道病毒清除后可能继续发生粪-口传播。

核酸检测无法确定病毒是否存活，以后的研究者需要对粪便样品阳性持续时间较长的患者、在较晚的时间点、使用新鲜粪便样品进行进一步研究，以确定病毒活性和传播潜能。另外，我们发现患者呼吸道样本病毒核酸转阴后他们的临床症状已经消失或症状较轻（未显示数据）。尽管已经有无症状传播者的报道，但SARS-CoV-2尚无通过粪-口传播的病例报告，这表明在隔离区域，包括医院内或自我隔离期间内通过这种途径进行传染的可能性很小。但是，在宿舍，火车，公共汽车和游轮等封闭式场所的粪-口传播的潜在感染风险增加。

呼吸道传播仍然是SARS-CoV-2的主要传播途径，且目前的证据还不足以认为呼吸道样本病毒阴性但粪便病毒阳性的患者制定切实可行的措施，因此需要进一步研究SARS-CoV-2在粪便中的生存力和感染性。

所有作者声明不存在利益冲突关系。本研究获得国家科技重大专项(2017ZX10302301-002)、国家自然科学基金(31200662)、广州市健康医疗协同创新重大专项(201704020226, 201604020006)、广东省自然科学基金(2015A030311009)、国家重点研发计划(2016YFC1200105)项目

支持。吴永坚、郭城、汤蓝天为共同第一作者。黄曦、江冠民和单鸿为共同通讯作者。

吴永坚、郭城、汤蓝天、洪仲思、周剑辉、董欣、尹欢、肖强、汤艳平、曲秀娟、邝良鉴、方小敏、Nischay Mishra、陆家海、单鸿、江冠民、黄曦。通讯作者邮箱：[huangxi1312@163.com](mailto:huangxi1312@163.com)。

中国广东省珠海市中山大学附属第五医院感染与免疫研究中心(吴永坚、汤蓝天、洪仲思、周剑辉、董欣、尹欢、肖强、邝良鉴、方小敏、江冠民、黄曦)，美国纽约市哥伦比亚大学梅尔曼公共卫生学院感染与免疫研究中心(郭城、Nischay Mishra)，中国广东省中山大学公共卫生学院(陆家海)，广东省珠海市中山大学附属第五医院介入医学科、广东省生物医学影像重点实验室、广东省分子影像学工程研究中心(单鸿)。

- Goh GK-M, Dunker AK, Foster JA, Uversky VN. Rigidity of the outer shell predicted by a protein intrinsic disorder model sheds light on the COVID-19 (Wuhan-2019-nCoV) infectivity. *Biomolecules* 2020; **10**: e331.
- Yeo C, Kaushal S, Yeo D. Enteric involvement of coronaviruses: is faecal-oral transmission of SARS-CoV-2 possible? *Lancet Gastroenterol Hepatol* 2020; published online Feb 19. [https://doi.org/10.1016/S2468-1253\(20\)30048-0](https://doi.org/10.1016/S2468-1253(20)30048-0).
- Munster VJ, Koopmans M, van Doremalen N, van Riel D, de Wit E. A novel coronavirus emerging in China - key questions for impact assessment. *N Engl J Med* 2020; **382**: 692-94.
- Bai Y, Yao L, Wei T, et al. Presumed asymptomatic carrier transmission of COVID-19. *JAMA* 2020; published online Feb 21. DOI:10.1001/jama.2020.2565.
